# Supplementary material for: A Novel Antimicrobial Peptide, Dermaseptin-SS1, with Anti-Proliferative Activity, Isolated from the Skin Secretion of <em>Phyllomedusa tarsius</em>
Source: Preprints.org preprint supplement (doi:10.20944/preprints202308.0727.v1), 2023-08-09
Supplement: Supplementary file 1 [file Appendix.docx]

**Appendix A. Supplementary data**

**Table S1.** Molecular weight (MW) of SS1 and analogues.

| **Peptide** | **MW** | **Sequence** |
| --- | --- | --- |
| SS1 | 2521 | ALWKSILKNAGKAALNEINQIVQ-NH2 |
| L14 | 2450 | ALWKSILKNAGKALNEINQIVQ-NH2 |
| 14V | 2549 | ALWKSILKNAGKAVLNEINQIVQ-NH2 |
| 14G | 2507 | ALWKSILKNAGKAGLNEINQIVQ-NH2 |
| L2V | 2506 | ALWKSILKNVGKVLNEINQIVQ-NH2 |
| 14V5K | 2590 | ALWKKILKNAGKAVLNEINQIVQ-NH2 |
| 14VL23 | 2421 | ALWKSILKNAGKAVLNEINQIV-NH2 |

**(a)
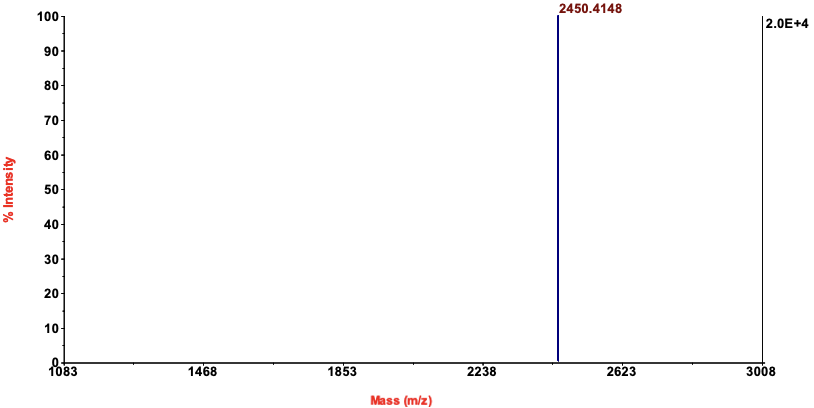
**

**(b)**

**(c)**

**(d)**

**(e)**

**(f)**

**(g)**

**Figure S1.** MALDI-TOF MS spectrum of SS1 and analogues **(a-g)**.
